# Supplementary material for: Co-expression Networks Identify DHX15 RNA Helicase as a B Cell Regulatory Factor
Source: Front Immunol. 2019 Dec 10;10:2903. doi: 10.3389/fimmu.2019.02903 (PMC6915936; doi:10.3389/fimmu.2019.02903)
Supplement: Supplementary file 4 [file Table_3.xlsx]

## Sheet: Exps.csv
Table S3-GEO accession numbers, annotations, and expression values used in Supplementary Figure 4
Sample geo accession	DHX15	TFRC	TYROBP	Sample source name ch1	Sample characteristics ch1
GSM2225743	11.2492	9.71806	1.44856	purified human naÃ¯ve B cells	subject status: healthy individualXx-xXtissue: tonsilsXx-xXcell type: purified human naive B cellsXx-xXcell subtype: IgD+ CD38low
GSM2225744	11.4083	10.1452	1.67059	purified human naÃ¯ve B cells	subject status: healthy individualXx-xXtissue: tonsilsXx-xXcell type: purified human naive B cellsXx-xXcell subtype: IgD+ CD38low
GSM2225745	11.7597	11.1253	1.23406	purified human germinal center B cells	subject status: healthy individualXx-xXtissue: tonsilsXx-xXcell type: purified human germinal center B cellsXx-xXcell subtype: CD77+ CD38high
GSM2225746	11.7835	11.3364	3.0766	purified human germinal center B cells	subject status: healthy individualXx-xXtissue: tonsilsXx-xXcell type: purified human germinal center B cellsXx-xXcell subtype: CD77+ CD38high
GSM2859429	10.9514	11.7841	6.39149	Switched memory B cells	cell type: Switched memory B cellsXx-xXdisease status: healthyXx-xXgender: M
GSM2991069	11.0914	9.90379	0.962618	B cell PBL	cell type: B cellXx-xXtumor stage: healthy
GSM1631665	11.2103	10.8379	1.18972	CCR6+ CD4+ T cells from HLA-DR4+ healthy control myelin tetramer negative	diagnosis: HealthyXx-xXcell population: CCR6+ CD4+ T cells from HLA-DR4+ healthy control myelin tetramer negative
GSM1631666	10.1813	10.3836	1.70856	CCR6+ CD4+ T cells from HLA-DR4+ healthy control myelin tetramer negative	diagnosis: HealthyXx-xXcell population: CCR6+ CD4+ T cells from HLA-DR4+ healthy control myelin tetramer negative
GSM1631667	11.2721	12.2168	2.04117	CCR6+ CD4+ T cells from HLA-DR4+ healthy control myelin tetramer negative	diagnosis: HealthyXx-xXcell population: CCR6+ CD4+ T cells from HLA-DR4+ healthy control myelin tetramer negative
GSM1631668	13.1537	14.389	1.56571	CCR6+ CD4+ T cells from HLA-DR4+ healthy control myelin tetramer positive	diagnosis: HealthyXx-xXcell population: CCR6+ CD4+ T cells from HLA-DR4+ healthy control myelin tetramer positive
GSM1631669	9.63678	10.9577	7.9318	CCR6+ CD4+ T cells from HLA-DR4+ healthy control myelin tetramer positive	diagnosis: HealthyXx-xXcell population: CCR6+ CD4+ T cells from HLA-DR4+ healthy control myelin tetramer positive
GSM1631670	10.9209	10.9626	1.10878	CCR6+ CD4+ T cells from HLA-DR4+ healthy control myelin tetramer positive	diagnosis: HealthyXx-xXcell population: CCR6+ CD4+ T cells from HLA-DR4+ healthy control myelin tetramer positive
GSM1861834	10.6193	10.5784	3.67481	memory (CD45RA-) CD4 T cell healthy control 1	cell subtype: memory (CD45RA-) CD4Xx-xXgroup: healthy controlXx-xXcell type: T cells (FACSsorted)
GSM1861835	10.8459	9.6048	2.67095	naive CD31- CD4+ T cell healthy control 1	cell subtype: naive CD31- CD4+Xx-xXgroup: healthy controlXx-xXcell type: T cells (FACSsorted)
GSM1861836	10.8751	9.54758	4.6532	naive CD31+ CD4+ T cell healthy control 1	cell subtype: naive CD31+ CD4+Xx-xXgroup: healthy controlXx-xXcell type: T cells (FACSsorted)
GSM1861837	10.8003	9.89731	3.32634	memory (CD45RA-) CD4 T cell healthy control 2	cell subtype: memory (CD45RA-) CD4Xx-xXgroup: healthy controlXx-xXcell type: T cells (FACSsorted)
GSM1861838	10.7043	9.12023	4.61278	naive CD31- CD4+ T cell healthy control 2	cell subtype: naive CD31- CD4+Xx-xXgroup: healthy controlXx-xXcell type: T cells (FACSsorted)
GSM1861839	10.6084	9.38643	5.6228	naive CD31+ CD4+ T cell healthy control 2	cell subtype: naive CD31+ CD4+Xx-xXgroup: healthy controlXx-xXcell type: T cells (FACSsorted)
GSM1861840	10.827	10.5942	4.59372	memory (CD45RA-) CD4 T cell healthy control 3	cell subtype: memory (CD45RA-) CD4Xx-xXgroup: healthy controlXx-xXcell type: T cells (FACSsorted)
GSM1861841	10.625	9.57183	2.8596	naive CD31- CD4+ T cell healthy control 3	cell subtype: naive CD31- CD4+Xx-xXgroup: healthy controlXx-xXcell type: T cells (FACSsorted)
GSM1861842	10.8909	9.46659	5.95067	naive CD31+ CD4+ T cell healthy control 3	cell subtype: naive CD31+ CD4+Xx-xXgroup: healthy controlXx-xXcell type: T cells (FACSsorted)
GSM2211621	11.4307	12.1806	0.196528	CD103+CD49a- CD8 TRM	tissue origin: healthy skinXx-xXcell type: epidermal CD8+CD103+CD49a- tissue resident memory T cellsXx-xXcell subset: CD49a-Xx-xXdonor: Subject 1
GSM2211622	11.2374	12.0732	0.294715	CD103+CD49a+ CD8 TRM	tissue origin: healthy skinXx-xXcell type: epidermal CD8+CD103+CD49a+ tissue resident memory T cellsXx-xXcell subset: CD49a+Xx-xXdonor: Subject 1
GSM2211623	11.5451	13.1928	1.93501	CD103+CD49a- CD8 TRM	tissue origin: healthy skinXx-xXcell type: epidermal CD8+CD103+CD49a- tissue resident memory T cellsXx-xXcell subset: CD49a-Xx-xXdonor: Subject 2
GSM2211624	11.9813	13.5236	4.90139	CD103+CD49a+ CD8 TRM	tissue origin: healthy skinXx-xXcell type: epidermal CD8+CD103+CD49a+ tissue resident memory T cellsXx-xXcell subset: CD49a+Xx-xXdonor: Subject 2
GSM2211625	11.5835	12.0087	0.24589	CD103+CD49a- CD8 TRM	tissue origin: healthy skinXx-xXcell type: epidermal CD8+CD103+CD49a- tissue resident memory T cellsXx-xXcell subset: CD49a-Xx-xXdonor: Subject 3
GSM2211626	11.035	12.1924	0.368604	CD103+CD49a+ CD8 TRM	tissue origin: healthy skinXx-xXcell type: epidermal CD8+CD103+CD49a+ tissue resident memory T cellsXx-xXcell subset: CD49a+Xx-xXdonor: Subject 3
GSM2211627	11.0899	12.4262	6.82447	CD103+CD49a- CD8 TRM	tissue origin: healthy skinXx-xXcell type: epidermal CD8+CD103+CD49a- tissue resident memory T cellsXx-xXcell subset: CD49a-Xx-xXdonor: Subject 4
GSM2211628	11.7445	12.6824	7.61518	CD103+CD49a+ CD8 TRM	tissue origin: healthy skinXx-xXcell type: epidermal CD8+CD103+CD49a+ tissue resident memory T cellsXx-xXcell subset: CD49a+Xx-xXdonor: Subject 4
GSM2211629	11.5931	12.5778	1.92878	CD103+CD49a- CD8 TRM	tissue origin: healthy skinXx-xXcell type: epidermal CD8+CD103+CD49a- tissue resident memory T cellsXx-xXcell subset: CD49a-Xx-xXdonor: Subject 5
GSM2211630	11.8034	12.751	2.43323	CD103+CD49a+ CD8 TRM	tissue origin: healthy skinXx-xXcell type: epidermal CD8+CD103+CD49a+ tissue resident memory T cellsXx-xXcell subset: CD49a+Xx-xXdonor: Subject 5
GSM2211631	12.1394	12.7323	2.10713	CD103+CD49a- CD8 TRM	tissue origin: healthy skinXx-xXcell type: epidermal CD8+CD103+CD49a- tissue resident memory T cellsXx-xXcell subset: CD49a-Xx-xXdonor: Subject 6
GSM2211632	12.259	13.127	4.05474	CD103+CD49a+ CD8 TRM	tissue origin: healthy skinXx-xXcell type: epidermal CD8+CD103+CD49a+ tissue resident memory T cellsXx-xXcell subset: CD49a+Xx-xXdonor: Subject 6
GSM2211633	11.7806	13.0696	3.22989	CD103+CD49a- CD8 TRM	tissue origin: healthy skinXx-xXcell type: epidermal CD8+CD103+CD49a- tissue resident memory T cellsXx-xXcell subset: CD49a-Xx-xXdonor: Subject 7
GSM2211634	11.489	13.3674	0.0375457	CD103+CD49a+ CD8 TRM	tissue origin: healthy skinXx-xXcell type: epidermal CD8+CD103+CD49a+ tissue resident memory T cellsXx-xXcell subset: CD49a+Xx-xXdonor: Subject 7
GSM2563824	10.707	10.5455	4.48119	CD4 T cells peripheral blood	gender: femaleXx-xXdisease status: healthyXx-xXstage of pregnancy: earlyXx-xXtissue: peripheral bloodXx-xXcell type: CD4+ T cells
GSM2563825	10.2793	9.5067	4.71517	CD4 T cells peripheral blood	gender: femaleXx-xXdisease status: healthyXx-xXstage of pregnancy: earlyXx-xXtissue: peripheral bloodXx-xXcell type: CD4+ T cells
GSM2563826	10.253	10.1387	6.42453	CD4 T cells peripheral blood	gender: femaleXx-xXdisease status: healthyXx-xXstage of pregnancy: earlyXx-xXtissue: peripheral bloodXx-xXcell type: CD4+ T cells
GSM2563827	10.6599	11.0253	8.61581	CD4 T cells decidua	gender: femaleXx-xXdisease status: healthyXx-xXstage of pregnancy: earlyXx-xXtissue: decidual tissuesXx-xXcell type: CD4+ T cells
GSM2563828	10.2229	9.88156	7.57765	CD4 T cells decidua	gender: femaleXx-xXdisease status: healthyXx-xXstage of pregnancy: earlyXx-xXtissue: decidual tissuesXx-xXcell type: CD4+ T cells
GSM2563829	10.239	10.1353	7.30498	CD4 T cells decidua	gender: femaleXx-xXdisease status: healthyXx-xXstage of pregnancy: earlyXx-xXtissue: decidual tissuesXx-xXcell type: CD4+ T cells
GSM2859439	11.3603	10.5191	1.36098	Naive CD8 T cells	cell type: Naive CD8 T cellsXx-xXdisease status: healthyXx-xXgender: M
GSM2859452	11.3955	9.81661	0.896014	Naive CD4 T cells	cell type: Naive CD4 T cellsXx-xXdisease status: healthyXx-xXgender: M
GSM2859470	11.2844	10.9835	4.8863	Effector memory CD8 T cells	cell type: Effector memory CD8 T cellsXx-xXdisease status: healthyXx-xXgender: F
GSM2991070	11.227	10.3835	6.68873	CD4+ PBL	cell type: CD4+ T cellXx-xXtumor stage: healthy
GSM2991073	11.0198	9.60062	8.54632	CD4+ PBL	cell type: CD4+ T cellXx-xXtumor stage: healthy
GSM2991080	11.2124	9.96494	7.44961	CD4+ PBL	cell type: CD4+ T cellXx-xXtumor stage: healthy
GSM2991084	11.1195	10.1755	7.66725	CD4+ PBL	cell type: CD4+ T cellXx-xXtumor stage: healthy
GSM2991088	11.1275	10.1689	6.26667	CD4+ PBL	cell type: CD4+ T cellXx-xXtumor stage: healthy
